# Supplementary material for: A retrospective evaluation of individual thigh muscle volume disparities based on hip fracture types in followed-up patients: an AI-based segmentation approach using UNETR
Source: PeerJ journal article supplement (doi:10.7717/peerj.17509), 2024-08-16
Supplement: Supplementary.docx [file Supplementary.docx]

Supplementary 1. Specification of participants information.

| **Index** | **Fracture type** | **Gender** | **Age** | **Height** | **Weight** | **Koval score** | **Follow-Up**  **(days)** |
| --- | --- | --- | --- | --- | --- | --- | --- |
| 1 | Femoral neck fracture | M | 66Y | 165.1 | 49 | 1 | 317 |
| 2 | Femoral neck fracture | M | 74Y | 168 | 57 | 1 | 375 |
| 3 | Femoral neck fracture | M | 88Y | 165 | 61 | 2 | 31 |
| 4 | Femoral neck fracture | M | 72Y | 165 | 48 | 1 | 373 |
| 5 | Femoral neck fracture | F | 70Y | 158 | 60 | 2 | 474 |
| 6 | Femoral neck fracture | F | 88Y | 160 | 50 | 5 | 34 |
| 7 | Intertrochanteric fracture | M | 65Y | 165 | 75 | 1 | 393 |
| 8 | Intertrochanteric fracture | M | 71Y | 165.1 | 57.3 | 1 | 872 |
| 9 | Intertrochanteric fracture | F | 51Y | 154 | 38 | 6 | 100 |
| 10 | Intertrochanteric fracture | F | 91Y | 150 | 50 | 1 | 107 |
| 11 | Intertrochanteric fracture | F | 81Y | 157 | 52 | 2 | 99 |
| 12 | Intertrochanteric fracture | F | 76Y | 162 | 64 | 3 | 491 |
| 13 | Intertrochanteric fracture | F | 74Y | 148 | 43 | 1 | 63 |
| 14 | Intertrochanteric fracture | F | 86Y | 155 | 38 | 2 | 108 |
| 15 | Intertrochanteric fracture | F | 82Y | 157 | 41.5 | 4 | 355 |
| 16 | Intertrochanteric fracture | F | 73Y | 151.1 | 56 | 1 | 517 |
| 17 | Intertrochanteric fracture | F | 82Y | 158 | 50 | 2 | 136 |
| 18 | Intertrochanteric fracture | F | 77Y | 159.7 | 62.7 | 1 | 364 |

Supplementary 2. Segmentation result images.

| 1 | | Pre-operative | | 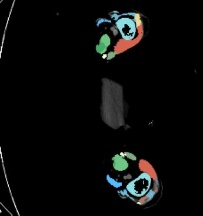 | | 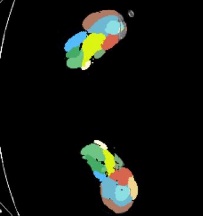 | | | 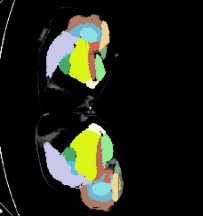 | | 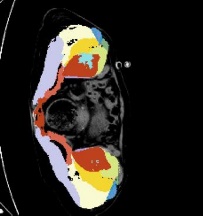 | |
| --- | --- | --- | --- | --- | --- | --- | --- | --- | --- | --- | --- | --- |
| Post-operative | | 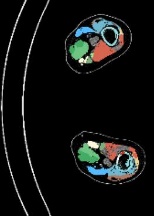 | | 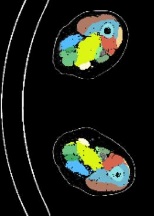 | | | 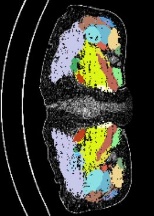 | | 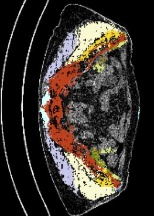 | |
| 2 | | Pre-operative | | 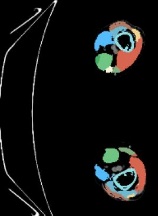 | | 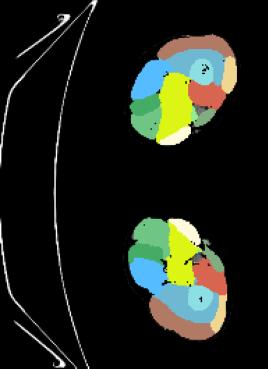 | | | 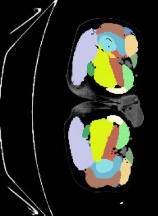 | | 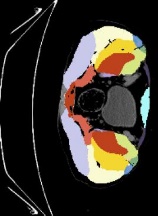 | |
| Post-operative | | 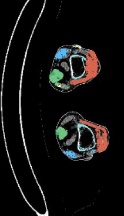 | | 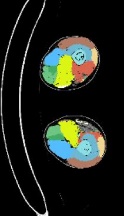 | | | 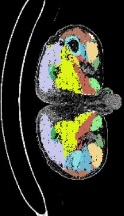 | | 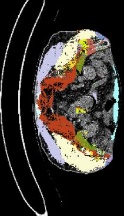 | |
| 3 | | Pre-operative | | 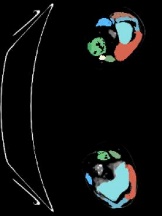 | | 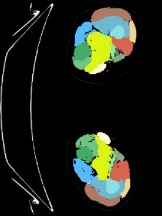 | | | 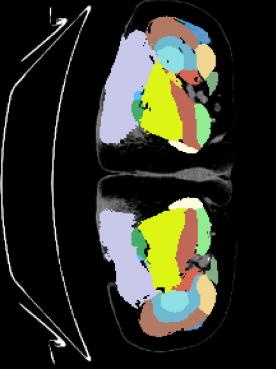 | | 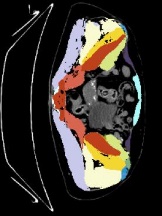 | |
| Post-operative | | 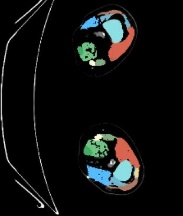 | | 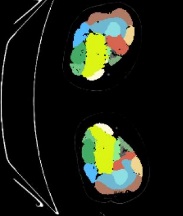 | | | 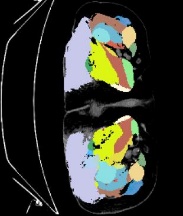 | | 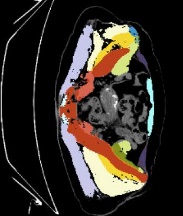 | |
| 3 | | Pre-operative | | 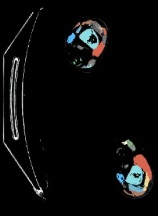 | | 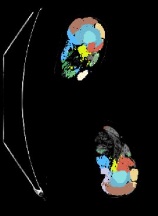 | | | 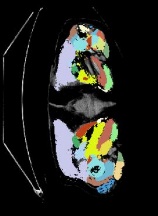 | | 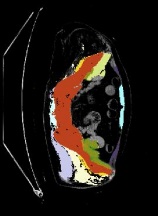 | |
| Post-operative | | 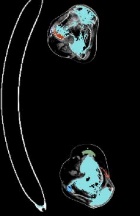 | | 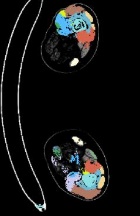 | | | 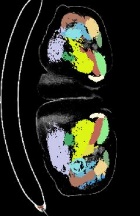 | | 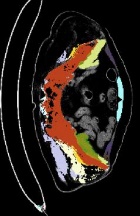 | |
| 5 | | Pre-operative | | 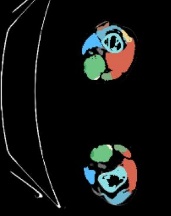 | | 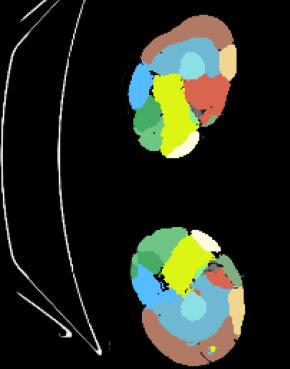 | 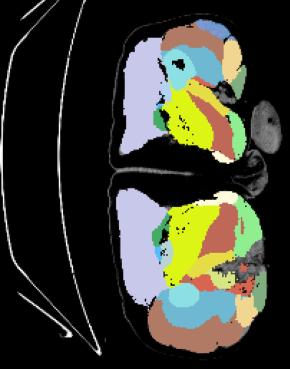 | | 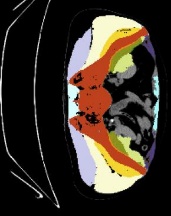 | |
| Post-operative | | 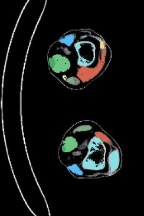 | | 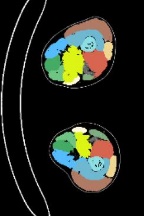 | 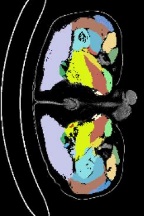 | | 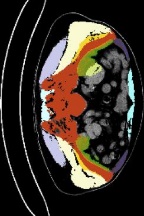 | |
| 6 | | Pre-operative | | 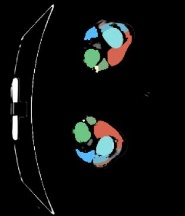 | | 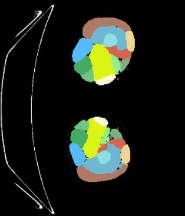 | 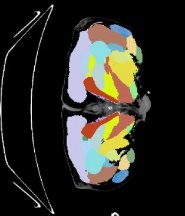 | | 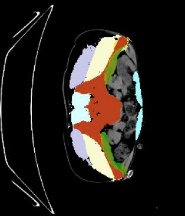 | |
| Post-operative | | 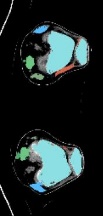 | | 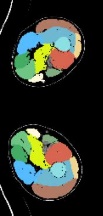 | 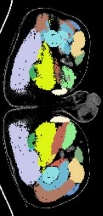 | | 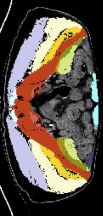 | |
| 7 | | Pre-operative | | 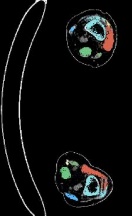 | | 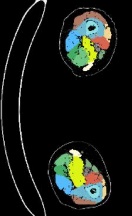 | 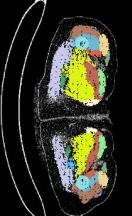 | | 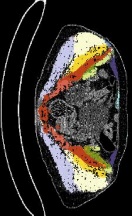 | |
| Post-operative | | 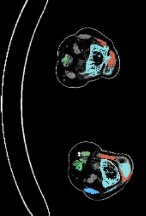 | | 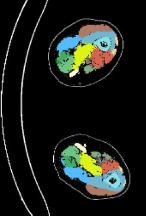 | 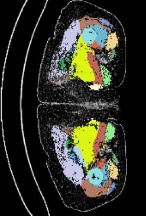 | | 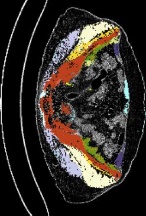 | |
| 8 | | Pre-operative | | 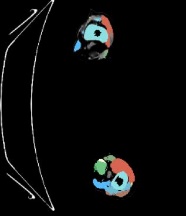 | | 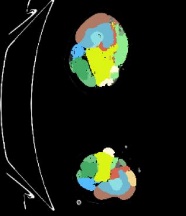 | 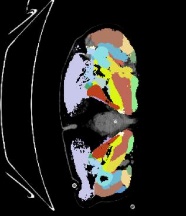 | | 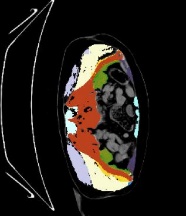 | |
| Post-operative | | 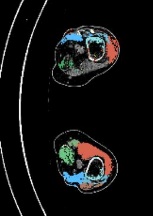 | | 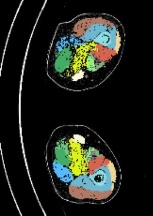 | 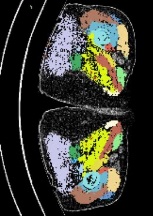 | | 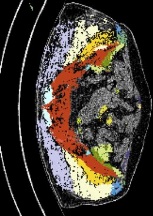 | |

| 9 | Pre-operative | 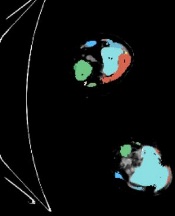 | 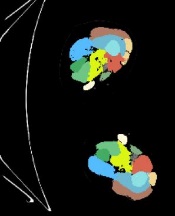 | 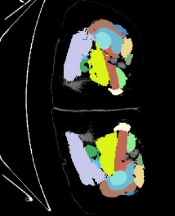 | 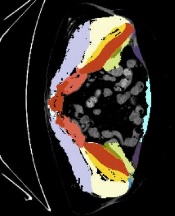 |
| --- | --- | --- | --- | --- | --- |
| Post-operative | 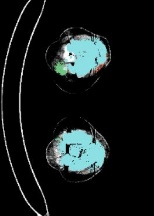 | 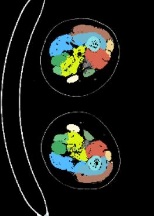 | 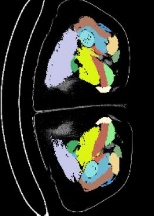 | 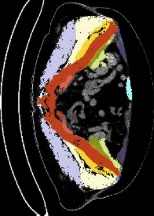 |
| 10 | Pre-operative | 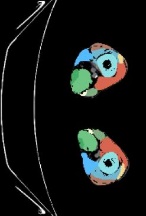 | 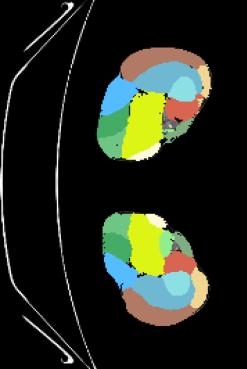 | 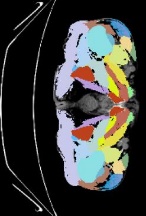 | 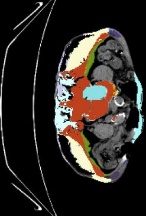 |
| Post-operative | 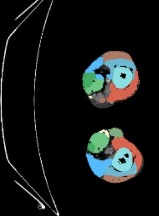 | 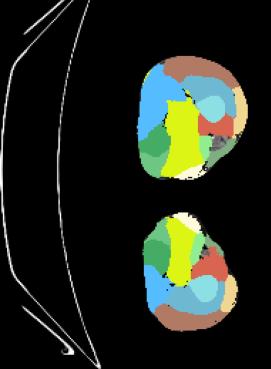 | 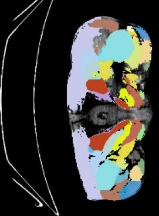 | 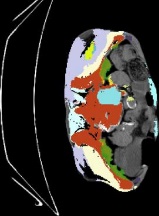 |
| 11 | Pre-operative | 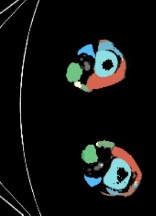 | 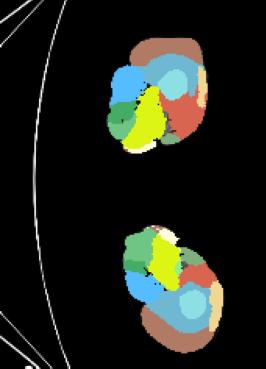 | 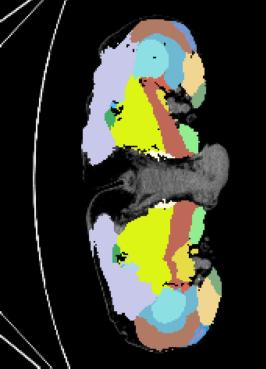 | 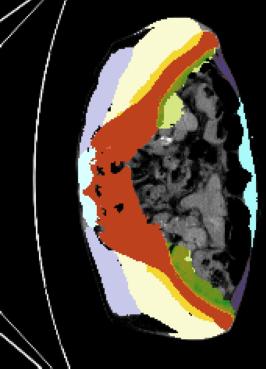 |
| Post-operative | 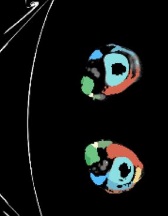 | 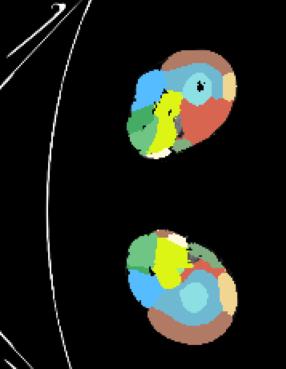 | 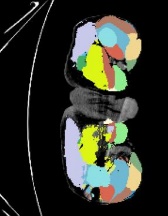 | 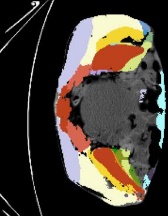 |
| 12 | Pre-operative | 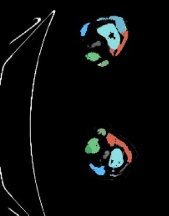 | 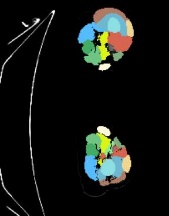 | 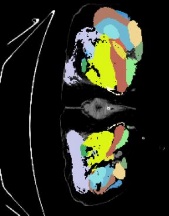 | 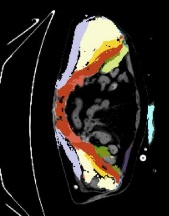 |
| Post-operative | 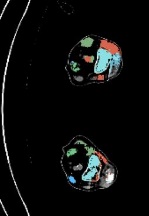 | 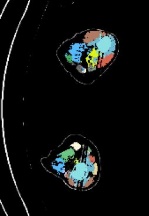 | 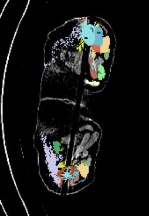 | 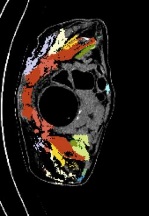 |

| 13 | Pre-operative | 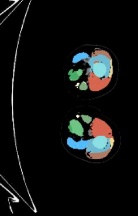 | 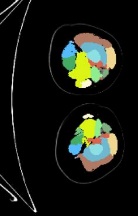 | 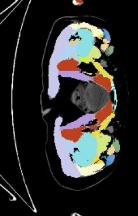 | 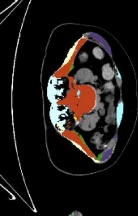 |
| --- | --- | --- | --- | --- | --- |
| Post-operative |  |  |  |  |
| 14 | Pre-operative |  |  |  |  |
| Post-operative |  |  |  |  |
| 15 | Pre-operative |  |  |  |  |
| Post-operative |  |  |  |  |
| 16 | Pre-operative |  |  |  |  |
| Post-operative |  |  |  |  |

| 17 | Pre-operative |  |  |  |  |
| --- | --- | --- | --- | --- | --- |
| Post-operative |  |  |  |  |
| 18 | Pre-operative |  |  |  |  |
| Post-operative |  |  |  |  |
